# Supplementary material for: Influence of oleic acid on the nucleation and growth of 4-N,N-dimethylamino-4-N-methyl-stilbazoliumtosylate (DAST) crystals
Source: Royal Society of Chemistry journal article supplement (doi:10.1039/c4ce02470b), 2015-01-01
Supplement: c4ce02470b1.pdf [file c4ce02470b1.pdf]

Supporting Information

Table 1. Sample code and their composition

| Sample Name | Mole ratio of DAST : OA | DAST (g) | Measured OA (g) |
|-------------|-------------------------|----------|-----------------|
| A           | 1:0                     | 0.256    | NIL             |
| B           | 1:1                     | 0.256    | 0.176           |
| C           | 1:2                     | 0.256    | 0.352           |

The simulated powder XRD pattern of hydrated DAST obtained from Bryant et al and that of pure DAST was from Marder et al<sup>1,2</sup>.

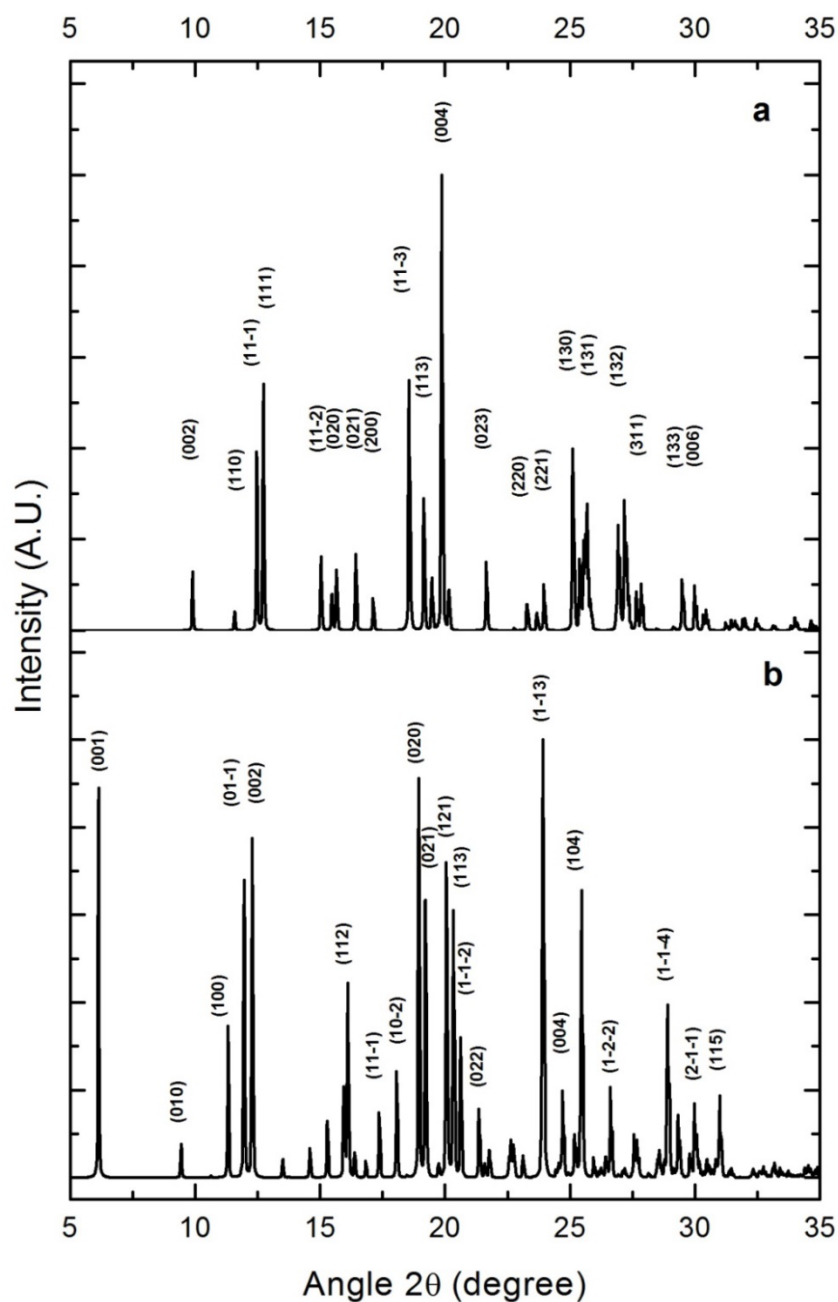

Fig. S1. (a) simulated powder XRD pattern of (a) pure and (b) hydrated DAST.

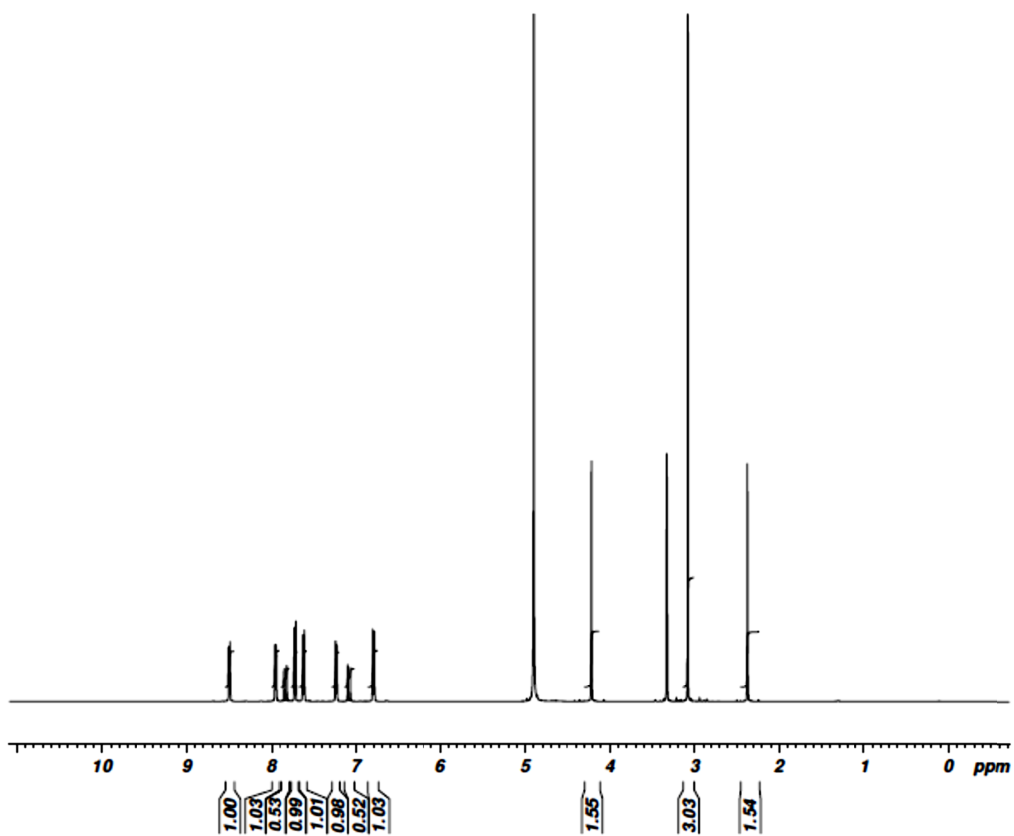

Fig. S2. NMR analysis of DAST (sample B)

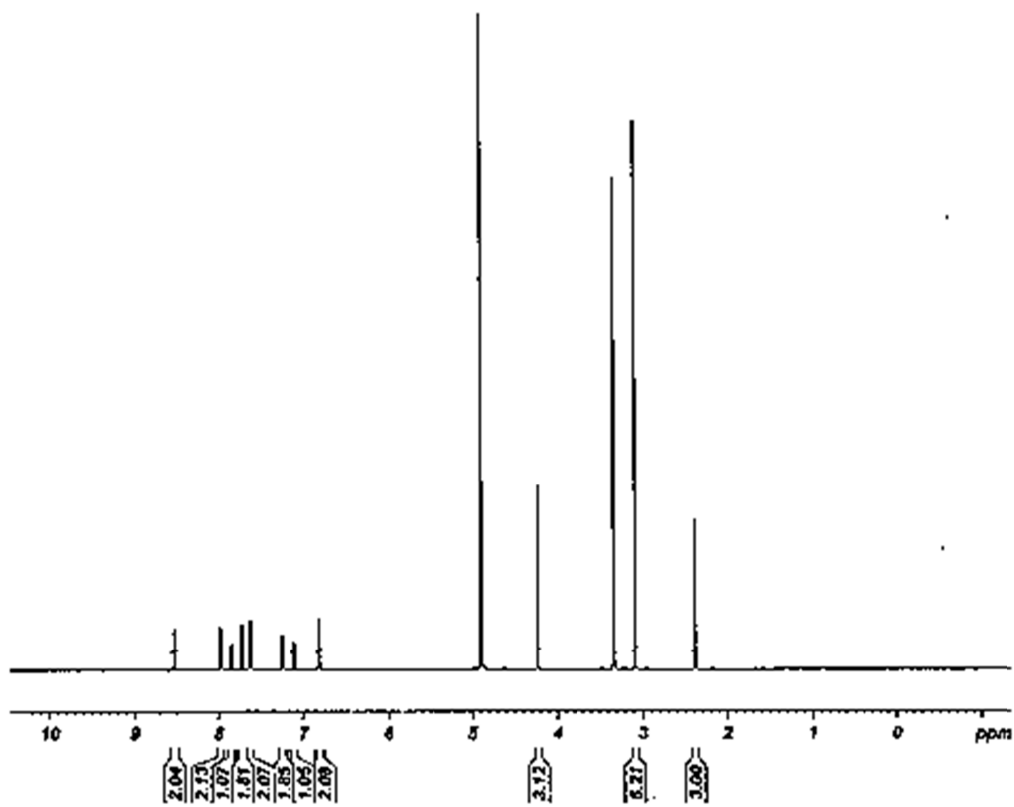

Fig. S3. NMR analysis of pure DAST

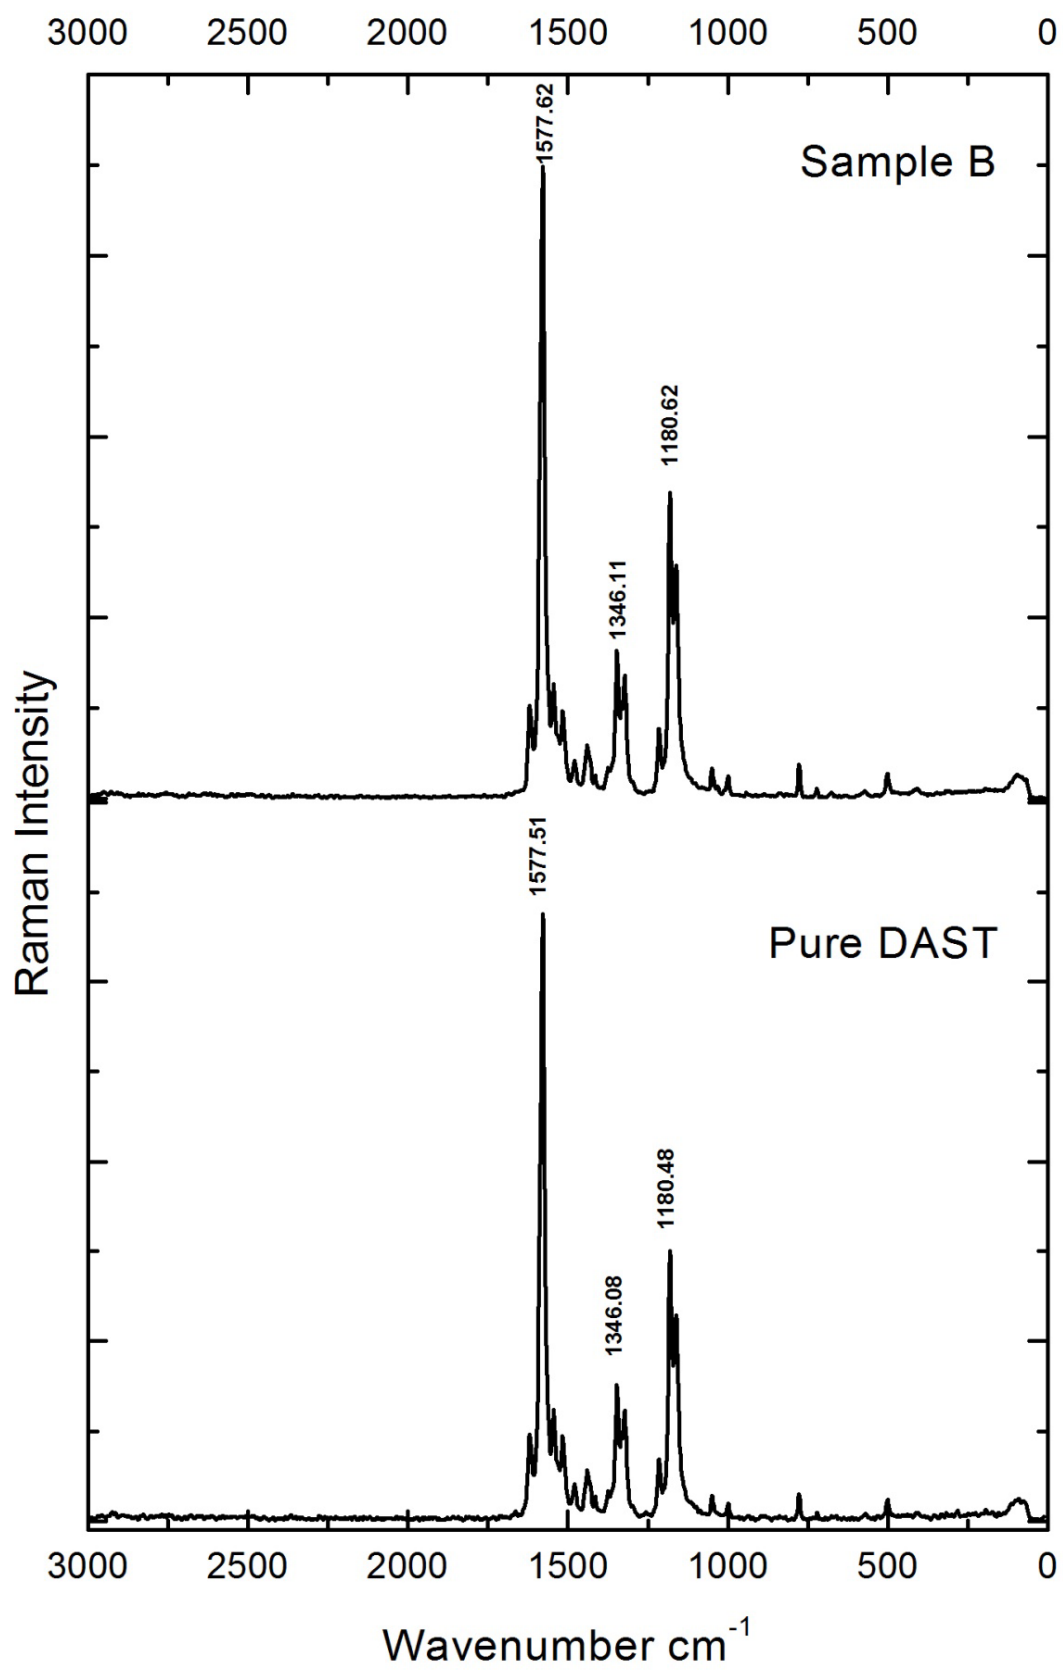

**Fig. S4.** Comparison of Raman spectrum of DAST (sample B) and pure DAST

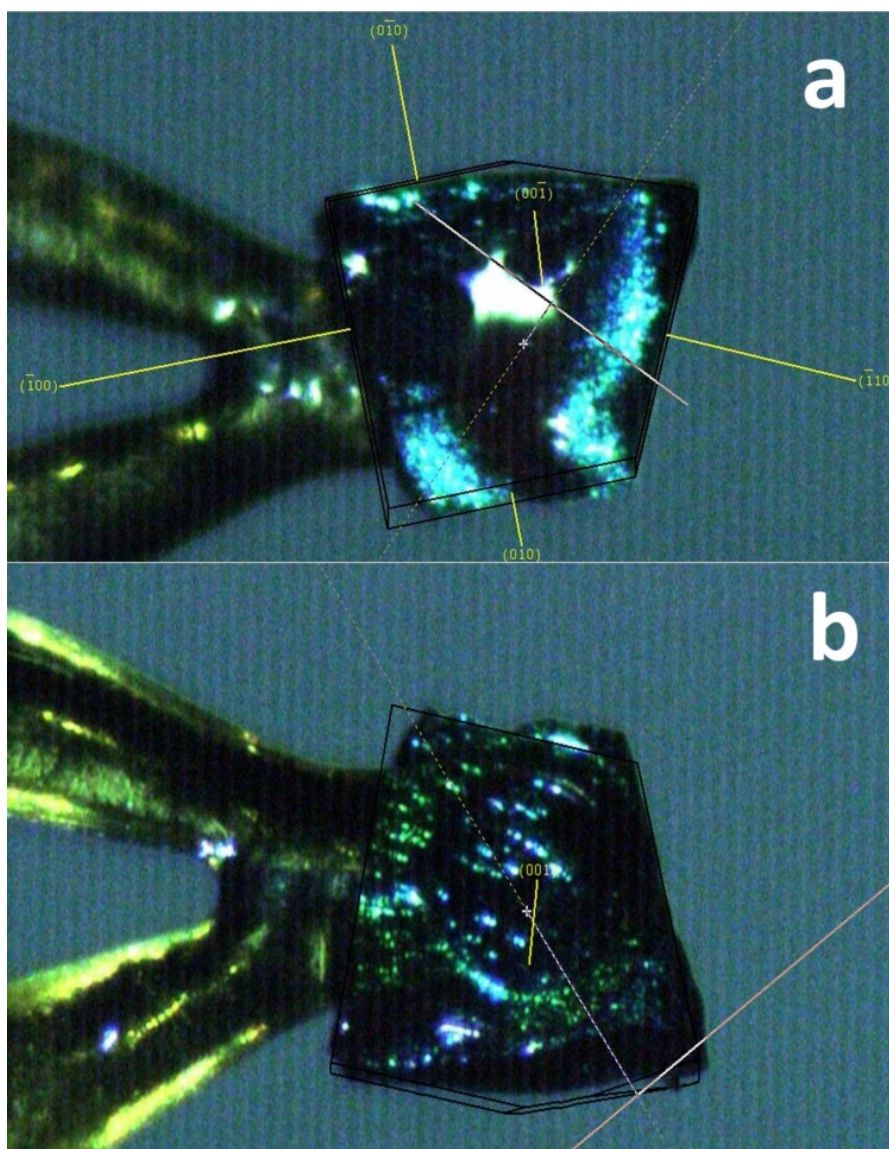

**Fig. S5.** (a) Morphology of DAST Crystals belonging to sample B with  $(00\bar{1})$  and (b)  $(001)$  faces indexed.

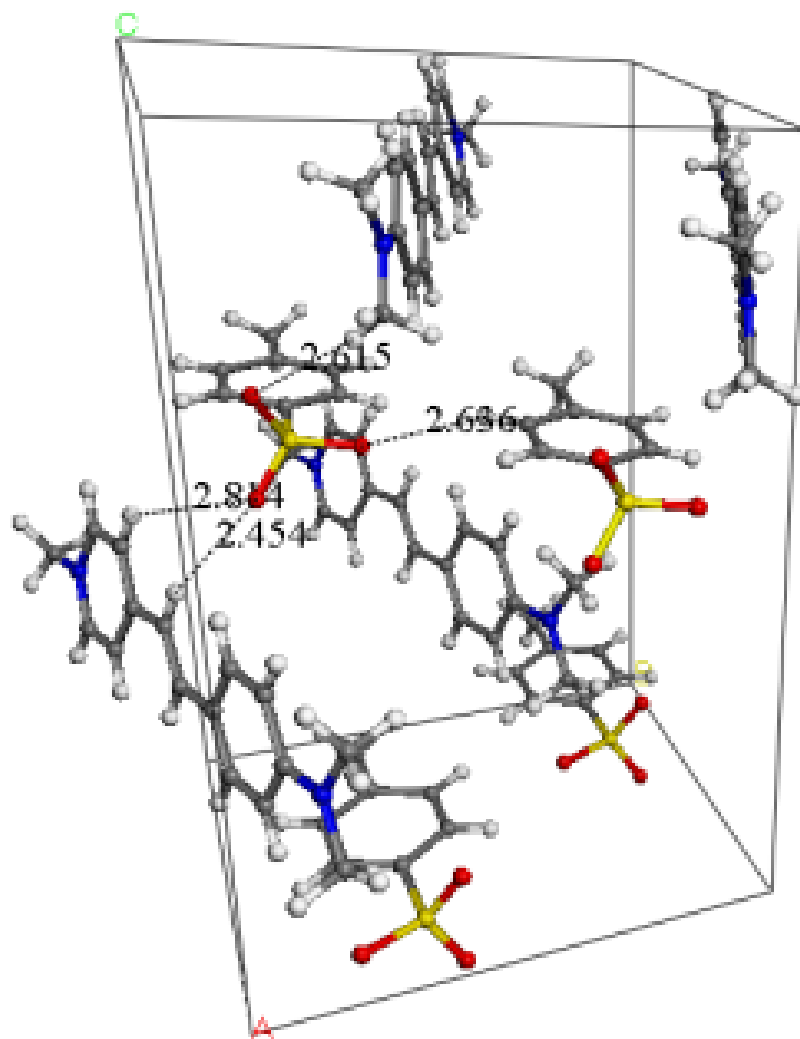

**Fig. S6.** Anion-anion and cation-anion hydrogen bonds in DAST.

**Reference:**

1. G. L. Bryant, C. P. Yakymyshyn, and K. R. Stewart, *Acta Cryst. C*, 1993, **49**, 350.
2. S. R. Marder, J. W. Perry and C. P. Yakymyshyn, *Chemistry of Materials*, 1994, **6**, 1137.
